# Supplementary material for: Follow-up of the manganese-exposed workers healthy cohort (MEWHC) and biobank management from 2011 to 2017 in China
Source: PubMed Central journal article supplement (PMC6090756; doi:10.1186/s12889-018-5880-0), 2018-08-01
Supplement: 12889_2018_5880_MOESM1_ESM.pdf [file 12889_2018_5880_MOESM1_ESM.pdf]

Supplement Table 1 Air monitoring of different workshops and jobs in the ferro-Mn alloy production plant in 2017.

| Branch                   | Workshop                 | Job title            | Number |
|--------------------------|--------------------------|----------------------|--------|
| Smelting branch          | Smelting workshop No.1   | Material worker      | 3      |
|                          |                          | Furnace face worker  | 3      |
|                          |                          | Electrician          | 3      |
|                          |                          | Scaleman             | 3      |
|                          |                          | Craneman of casting  | 3      |
|                          |                          | Furnaceman           | 3      |
|                          |                          | Dedusting workers    | 3      |
|                          | Smelting workshop No.2   | Material workers     | 3      |
|                          |                          | Furnace face worker  | 3      |
|                          |                          | Electrician          | 3      |
|                          |                          | Scaleman             | 3      |
|                          |                          | Craneman of casting  | 3      |
|                          |                          | Furnaceman           | 3      |
|                          |                          | Dedusting workers    | 3      |
|                          | Smelting workshop No.3   | Craneman of material | 3      |
|                          |                          | Material workers     | 3      |
|                          |                          | Furnace face worker  | 3      |
|                          |                          | Electrician          | 3      |
|                          |                          | Scaleman             | 3      |
|                          |                          | Craneman of casting  | 3      |
|                          |                          | Furnaceman           | 3      |
| Smelting workshop No.4   | Furnace face worker      | 3                    |        |
|                          | Electrician              | 3                    |        |
|                          | Scaleman                 | 3                    |        |
|                          | Craneman of casting      | 3                    |        |
|                          | Furnaceman               | 3                    |        |
|                          | Dedusting workers        | 3                    |        |
| The maintenance workshop | Welder                   | 3                    |        |
|                          | Fitter                   | 3                    |        |
| Logistics branch         | The maintenance workshop | Welder               | 3      |
|                          |                          | Fitter               | 3      |

|        |                            |                       |     |
|--------|----------------------------|-----------------------|-----|
|        | Raw material workshop      | Sieving workers       | 3   |
|        |                            | Plugman               | 3   |
|        | Testing laboratory         | Chemical analyst      | 3   |
|        |                            | Sampleman (stokehole) | 3   |
|        |                            | Sampleman (material)  | 3   |
|        | Finished products workshop | Human crushing worker | 8   |
|        |                            | Loading workmen       | 2   |
| Others | Outside the office         | Administration staff  | 3   |
|        | Inside the office          | Administration staff  | 3   |
|        | Staff Dining Hall          | Cook                  | 3   |
|        | Switching room             | Blank control group   | 5   |
| <hr/>  |                            |                       |     |
|        | Total                      |                       | 135 |
| <hr/>  |                            |                       |     |
