# Supplementary material for: Follow-up of the manganese-exposed workers healthy cohort (MEWHC) and biobank management from 2011 to 2017 in China
Source: BMC Public Health. 2018 Aug 1;18:944. doi: 10.1186/s12889-018-5880-0 (PMC6090756; doi:10.1186/s12889-018-5880-0)
Supplement: Supplementary file 3 — Table S2. Summary of the number of samples deposited in the biobank obtained from the heavy-metal cohort (MEWHC) initiated in 2011. (PDF 89 kb) [file 12889_2018_5880_MOESM3_ESM.pdf]

---

Supplement Table 2 Summarizes all the number of samples deposited in the biobank obtained from the heavy metal cohorts (MEWHC) initiated in 2011.

| Sample type   | On-the-spot workers<br>(n=(2359)) |         | Retired workers<br>(n=(612)) |         | Total  |
|---------------|-----------------------------------|---------|------------------------------|---------|--------|
|               | Number                            | Percent | Number                       | Percent | Number |
| Blood / DNA   | 2359                              | 100     | 612                          | 100     | 2971   |
| Urine samples | 2359                              | 100     | 612                          | 100     | 2971   |
| Fecal samples | 719                               | 30.5    | 507                          | 82.8    | 1226   |
| Hair samples  | 931                               | 39.5    | 593                          | 96.9    | 1524   |
| Nail samples  | 811                               | 34.4    | 593                          | 96.9    | 1404   |
